# Supplementary material for: Abrogation of Constitutive and Induced Type I and Type III Interferons and Interferon-Stimulated Genes in Keratinocytes by Canine Papillomavirus 2 E6 and E7
Source: MDPI journal article supplement (doi:10.3390/v12060677), 2020-06-23
Supplement: s1 [file s1]

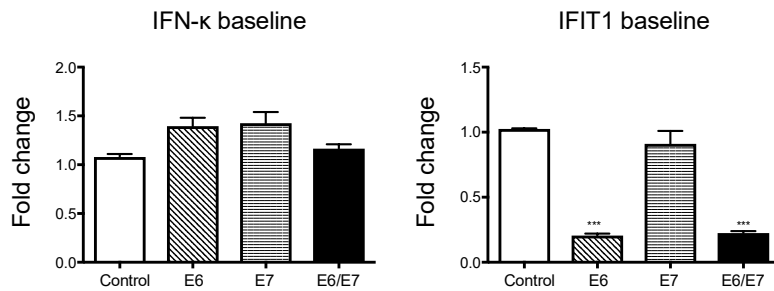

**Supplemental Fig. 2. Constitutive mRNA expression of interferon (IFN)- $\kappa$  and IFIT1 in canine papillomavirus (CPV)2 E6, E7, and E6/E7 expressing canine keratinocytes.** Canine keratinocytes were generated that express vector only, CPV2 E6, CPV2 E7, or CPV2 E6/E7 using retrovirus stocks prepared by transfecting the retrovirus packaging cell line SD3443 cells with vector only, CPV2 E6, CPV2 E7, or CPV2 E6/E7 retrovirus constructs using Fugene as specified by the manufacturer and as previously described [24]. Primary canine keratinocytes expressing vector only, CPV2 E6, CPV2 E7, or CPV2 E6/E7 were cultured for 48 hours before mRNA expression of IFN- $\kappa$  and IFIT1 were assessed by quantitative RT-PCR. Resulting Cq values were normalized to the Cq value of the reference gene and calibrated to mRNA expression in vector only control. mRNA expression of IFN- $\kappa$  was not significantly altered in any of the cells. mRNA expression of IFIT1 was significantly diminished in canine keratinocyte expressing CPV2 E6 and CPV2 E6/E7. Experiments were performed in triplicate and repeated in two independent experiments. Results are expressed as mean  $\pm$  SEM. \*\*\* $p$ <0.001. IFIT1, IFN-Induced Protein with Tetratricopeptide Repeats 1.
